# Supplementary material for: Polyaniline Functionalized Peptide Self-Assembled Conductive Hydrogel for 3D Cell Culture
Source: MDPI journal article supplement (doi:10.3390/gels8060372), 2022-06-13
Supplement: s1 [file s1]

# Polyaniline Functionalized Peptide Self-Assembled Conductive Hydrogel for 3D Cell Culture

Jieling Li <sup>1,†</sup>, Yan Xue <sup>1,2,†</sup>, Anhe Wang <sup>1</sup>, Shaonan Tian <sup>3</sup>, Qi Li <sup>1,\*</sup> and Shuo Bai <sup>1,\*</sup>

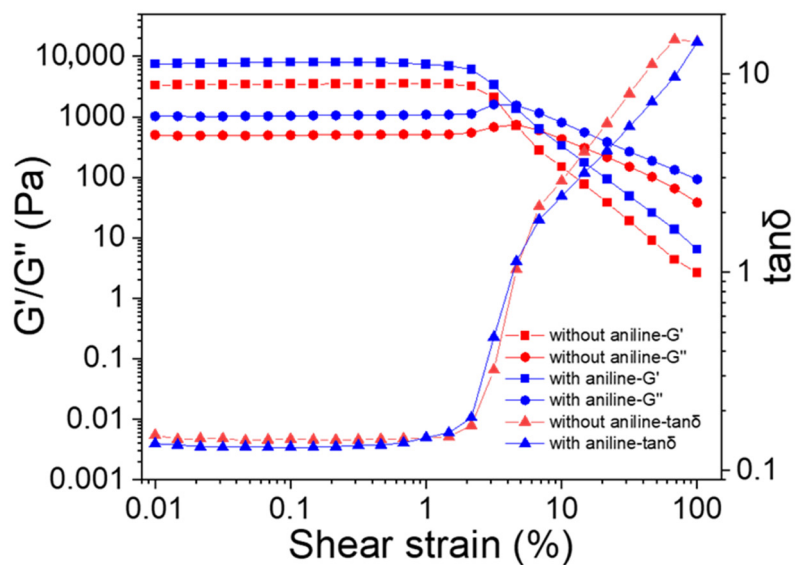

Figure S1. Rheological behavior of the hydrogels.

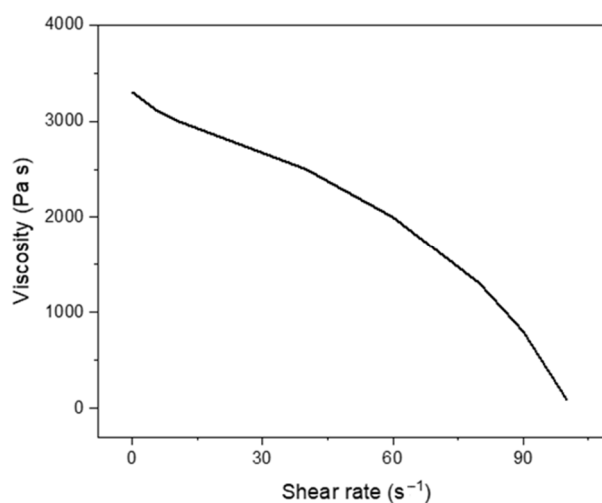

Figure S2. Shear thinning test of polyaniline doped conductive hydrogel.

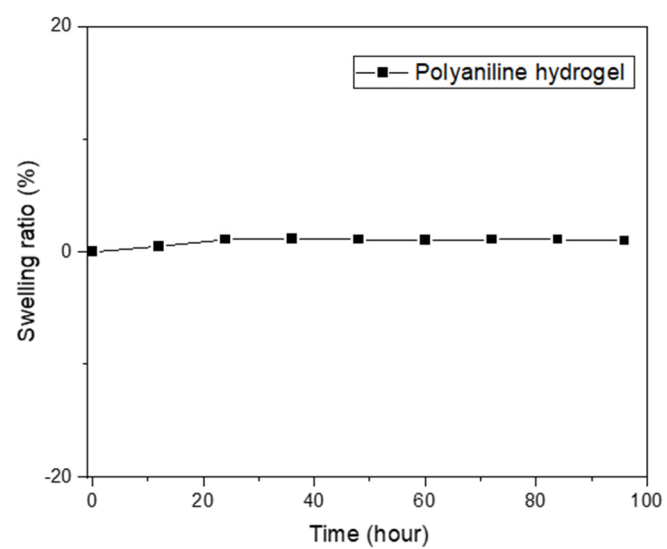

Figure S3. Swelling behavior of polyaniline doped conductive hydrogel.

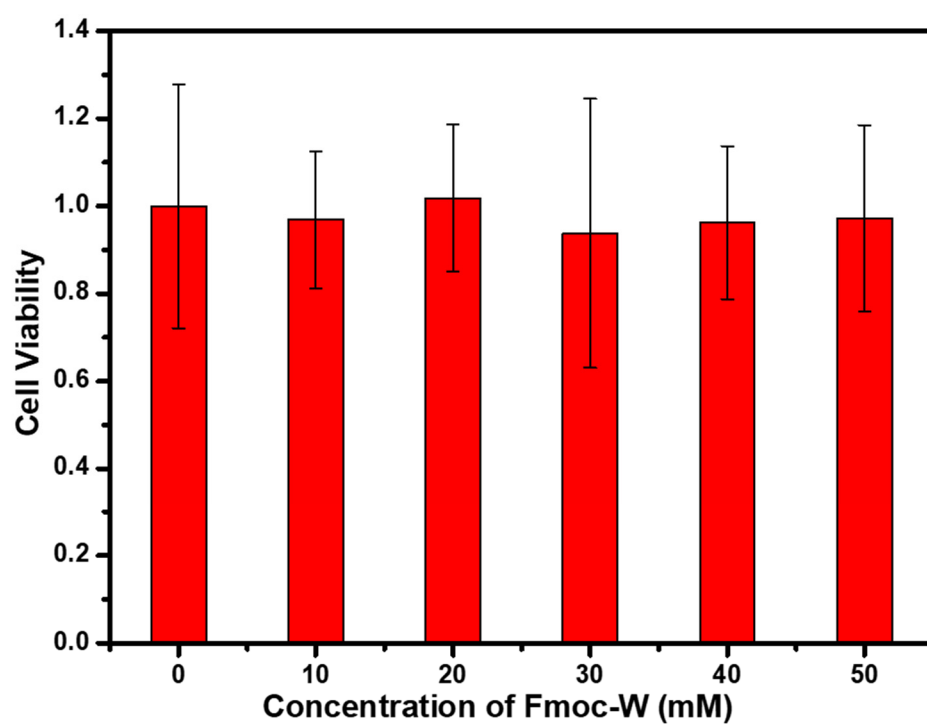

Figure S4. CCK-8 experiment with different Fmoc-w concentrations.
